# Supplementary material for: Study on the Infection Mechanism of Penicillium Digitatum on Postharvest Citrus (Citrus Reticulata Blanco) Based on Transcriptomics
Source: PubMed Central journal article supplement (PMC6956011; doi:10.3390/microorganisms7120672), 2019-12-10
Supplement: microorganisms-07-00672-s001.pdf [file microorganisms-07-00672-s001.pdf]

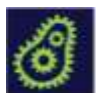

**Table S1.** Gene specificity primers used in this study.

| Gene Name     | Primer   | Primer Sequence (5' to 3') |
|---------------|----------|----------------------------|
| <i>pgaX</i>   | pgaX-F   | TGGATGGTAACGGTCAGGTCTGG    |
|               | pgaX-R   | GCGAGTAACGAAGGTTGAGAGGTC   |
| <i>eglB</i>   | eglB-F   | CACTGTCACTGCCACTGCCAAG     |
|               | eglB-R   | GGTCCAGTTGATGCCACCACAC     |
| <i>CELB</i>   | CELB-F   | CGATGCCTCACTCACCAACTG      |
|               | CELB-R   | CAGCACGCAGGAGATGTCAAGAC    |
| <i>cbhA</i>   | cbhA-F   | GTTGGCTCTCGTCTGTTCTGATG    |
|               | cbhA-R   | GCTCCATTGAGTCCGCAAGGC      |
| <i>galA</i>   | galA-F   | TTGCGGCAATCATCTCGATGTG     |
|               | galA-R   | TGTTGCTGTAGCTGCTTGTTCCTC   |
| <i>manA</i>   | manA-F   | CCTGGACTATGTTGTTGCCTCTGC   |
|               | manA-R   | TAGGCGGCCATACCTCCATAATCC   |
| <i>xyn2</i>   | xyn2-F   | CGATCACCACGAGCCAGCAAG      |
|               | xyn2-R   | TCACCTGAAGCACCGTTGTTGTAG   |
| <i>abnA</i>   | abnA-F   | CCGCCAGCGGAGCAGAATAC       |
|               | abnA-R   | CAGGACCGTATACTGTGCCATGAC   |
| <i>btgE</i>   | btgE-F   | GCTTCCTTCATCCAGTCCGCTTC    |
|               | btgE-R   | GATGTCAACGGCACCGCAGAG      |
| <i>brlA</i>   | brlA-F   | CGATGCCTCAGTACAACCAGATGG   |
|               | brlA-R   | ATCGGACGAGACAAGCAAGGATTG   |
| <i>abaA</i>   | abaA-F   | CCGTAACCTTCTTCCGCTCCTTGTC  |
|               | abaA-R   | GCCATACGCTTGCTCTCATCACC    |
| <i>wetA</i>   | wetA-F   | GCCTTCTCAGTACGACGCAAGAC    |
|               | wetA-R   | TGGCTGCCGTGCTGACATTG       |
| <i>VEA1</i>   | VEA1-F   | CCACCGCCGATGATACGATTGC     |
|               | VEA1-R   | GCCGATGTCAAGTTGGACGAGTAG   |
| <i>CCC1</i>   | CCC1-F   | GGTGGTATTGCCGCTGGTTCTG     |
|               | CCC1-R   | GTCATGCTTGTGGTCCTCGTGAG    |
| <i>FET5</i>   | FET5-F   | GTCCACAAGCCAGCATCCAGATC    |
|               | FET5-R   | TGCTGCATCGACGCTGTCAAC      |
| <i>FET3</i>   | FET3-F   | GTGGATGTTGCCTCTGACCTTGTC   |
|               | FET3-R   | CCGCACCGTTCCGTAGATTGTTC    |
| <i>Mic-33</i> | Mic-33-F | ACGCAACCAAGACCGCTATTGAG    |
|               | Mic-33-R | GCCAGTCCGCCATTGAAGAAGG     |
| <i>gdh-1</i>  | gdh-1-F  | AACGAGCACGACGAGATGGTTATG   |
|               | gdh-1-R  | CGGAACTCAGAGCTGATGACAAGG   |
| <i>NoxA</i>   | NoxA-F   | GGCTACGACGTGTGCGAGTTCATC   |
|               | NoxA-R   | CAGCGGTGTCAGCGTCAAGG       |

|                 |        |                          |
|-----------------|--------|--------------------------|
| <i>pacC</i>     | pacC-F | CGCACAGTCATACACCTCCAACC  |
|                 | pacC-R | GGTCATACGCAACGCTCAGAGTAG |
| <i>β-tublin</i> | Tub-F  | GATTGTCTTGAGAAATACTG     |
|                 | Tub-R  | TGTACCAGTGCAAGAAAGCC     |

Table S2. Number of differentially expressed genes annotated.

| DEG Set | Total | Swiss-Prot | GO   | KEGG | COG  | KOG  | Pfam | NR   |
|---------|-------|------------|------|------|------|------|------|------|
| A vs B  | 4582  | 3100       | 3278 | 1219 | 1891 | 2360 | 3061 | 4565 |

Table S3. The DEGs related to growth of *Penicillium digitatum* spores.

| Gene ID    | Gene Name   | Function Classification  | Description              | Fold Change |
|------------|-------------|--------------------------|--------------------------|-------------|
| PDIP_05330 | <i>brlA</i> | growth                   | conidiophore stalks      | -3.35       |
| PDIP_20340 | <i>abaA</i> | growth                   | phialides                | -2.35       |
| PDIP_44350 | <i>wetA</i> | growth                   | conidiospore             | -2.92       |
| PDIP_21430 | <i>VEAI</i> | growth; oxidative stress | growth; oxidative stress | 1.76        |
| PDIP_64730 | <i>VelB</i> | growth; oxidative stress | growth; oxidative stress | 1.63        |
| PDIP_33270 | <i>vosA</i> | growth                   | conidiospore             | -1.58       |

Table S4. The up-regulated DEGs related to pH.

| Gene ID    | Gene Name   | Function Classification     | Description                             | Fold Change |
|------------|-------------|-----------------------------|-----------------------------------------|-------------|
| PDIP_57180 | <i>gox</i>  | Organic acid                | Glucose oxidase                         | 2.53        |
| PDIP_86430 | <i>patE</i> | Precursors for organic acid | glucose-methanol-choline oxidoreductase | 5.72        |
| PDIP_54170 | <i>xptC</i> | Precursors for organic acid | glucose-methanol-choline oxidoreductase | 2.33        |
| PDIP_23540 | <i>patE</i> | Precursors for organic acid | glucose-methanol-choline oxidoreductase | 2.08        |
| PDIP_84520 | <i>citC</i> | Precursors for organic acid | glucose-methanol-choline oxidoreductase | 1.05        |

Table S5. The DEGs related to iron transport.

| Gene ID    | Gene Name     | Function Classification   | Description                        | Fold Change |
|------------|---------------|---------------------------|------------------------------------|-------------|
| PDIP_76510 | <i>CCC1</i>   | Iron storage              | Transport protein                  | 7.81        |
| PDIP_65530 | <i>FET5</i>   | Iron uptake rate          | Iron transport multicopper oxidase | 7.45        |
| PDIP_59000 | <i>FET3</i>   | Iron uptake rate          | Iron transport multicopper oxidase | 4.51        |
| PDIP_44440 | <i>NRPS12</i> | Synthesis of iron carrier | Non ribosome peptide synthetase    | 3.35        |
| PDIP_39920 | <i>NRPS11</i> | Synthesis of iron carrier | Non ribosome peptide synthetase    | -1.03       |

**Table S6.** The up-regulated DEGs related to ethylene.

| Gene ID    | Gene Name     | Function Classification       | Description                    | Fold Change |
|------------|---------------|-------------------------------|--------------------------------|-------------|
| MSTRG.6263 | <i>AAT2</i>   | Ethylene synthesis            | Aspartate amino transferase    | 3.35        |
| PDIP_36570 | <i>Mic-33</i> | Precursors for ethylene       | 2-oxoglutarate carrier protein | 5.62        |
| PDIP_06610 | <i>htyE</i>   | Ethylene forming enzyme (EFE) | 2-oxoglutarate                 | 1.70        |
| PDIP_83100 | <i>encD</i>   | Ethylene forming enzyme (EFE) | 2-oxoglutarate-Fe(II)          | 1.93        |
| PDIP_08660 | <i>citB</i>   | Ethylene forming enzyme (EFE) | 2-oxoglutarate-Fe(II)          | 1.14        |
| PDIP_32270 | <i>gdh-1</i>  | Precursors for ethylene       | generate 2-oxoglutarate        | 1.93        |

**Table S7.** The up-regulated DEGs related to anti-oxidative stress.

| Gene ID    | Gene Name     | Function Classification   | Description                            | Fold Change |
|------------|---------------|---------------------------|----------------------------------------|-------------|
| PDIP_07850 | <i>tef3</i>   | Glutathione S-transferase | Elongation factor 1-gamma              | 8.20        |
| PDIP_64830 | <i>hpm2</i>   | Glutathione S-transferase | Transferase activity                   | 5.11        |
| PDIP_62390 | <i>GTT1</i>   | Glutathione S-transferase | Transferase activity                   | 3.37        |
| PDIP_06860 | <i>ustS</i>   | Glutathione S-transferase | Glutathione S-transferase-like protein | 3.15        |
| PDIP_12980 | <i>FUS2</i>   | Glutathione S-transferase | 20-hydroxy-prefusarin hydrolase        | 2.99        |
| PDIP_26410 | <i>mtx1</i>   | Glutathione S-transferase | Metaxin-1                              | 2.08        |
| PDIP_11910 | <i>FUS3</i>   | Glutathione S-transferase | Glutathione S-transferase-like protein | 1.43        |
| PDIP_77260 | <i>gedE</i>   | Glutathione S-transferase | Glutathione S-transferase-like protein | 1.34        |
| PDIP_74290 | <i>tpcF</i>   | Glutathione S-transferase | Glutathione transferase activity       | 1.32        |
| PDIP_74730 | <i>tpcF</i>   | Glutathione S-transferase | Glutathione S-transferase-like protein | 1.32        |
| PDIP_80930 | <i>gto2</i>   | Glutathione S-transferase | Glutathione S-transferase omega-like   | 1.10        |
| PDIP_86820 | <i>unknow</i> | Catalase                  | oxidation-reduction process            | 3.15        |
| PDIP_67580 | <i>catB</i>   | Catalase                  | Inorganic ion transport and metabolism | 2.76        |
| PDIP_05940 | <i>PXP9</i>   | Catalase                  | Peroxisomal catalase                   | 1.63        |

**Table S8.** The up-regulated DEGs related to effectors.

| Gene ID    | Gene Name    | Function Classification   | Description                      | Fold Change |
|------------|--------------|---------------------------|----------------------------------|-------------|
| PDIP_77830 | unknow       | Necrosis inducing protein | Necrosis inducing protein        | 7.23        |
| MSTRG.1774 | unknow       | Necrosis inducing protein | Necrosis inducing protein        | 6.25        |
| PDIP_06030 | unknow       | LysM domain               | Killer toxin subunits alpha/beta | 4.55        |
| PDIP_59730 | unknow       | LysM domain               | Killer toxin subunits alpha/beta | 1.11        |
| MSTRG.8292 | <i>chiA1</i> | Chitinase                 | Chitinase activity               | 6.00        |
| PDIP_36560 | <i>chiA</i>  | Chitinase                 | Chitinase activity               | 5.62        |
| PDIP_53900 | <i>ctcA</i>  | Chitinase                 | Chitinase activity               | 5.06        |

|            |              |           |                    |      |
|------------|--------------|-----------|--------------------|------|
| MSTRG.3881 | <i>DAN4</i>  | Chitinase | Chitinase activity | 4.72 |
| PDIP_79160 | <i>chiA</i>  | Chitinase | Chitinase activity | 4.49 |
| PDIP_84020 | <i>chiA</i>  | Chitinase | Chitinase activity | 3.17 |
| PDIP_85490 | <i>chiA</i>  | Chitinase | Chitinase activity | 2.27 |
| PDIP_16610 | <i>chiA1</i> | Chitinase | Metal ion binding  | 2.06 |
| PDIP_06200 | <i>chiA</i>  | Chitinase | Chitinase activity | 1.70 |
| PDIP_09650 | <i>CH11</i>  | Chitinase | Chitinase activity | 1.63 |
| PDIP_83360 | <i>chiB</i>  | Chitinase | Chitinase activity | 1.55 |
| PDIP_53760 | <i>CH11</i>  | Chitinase | Chitinase activity | 1.39 |
| PDIP_82800 | <i>chiA1</i> | Chitinase | Chitinase activity | 1.05 |

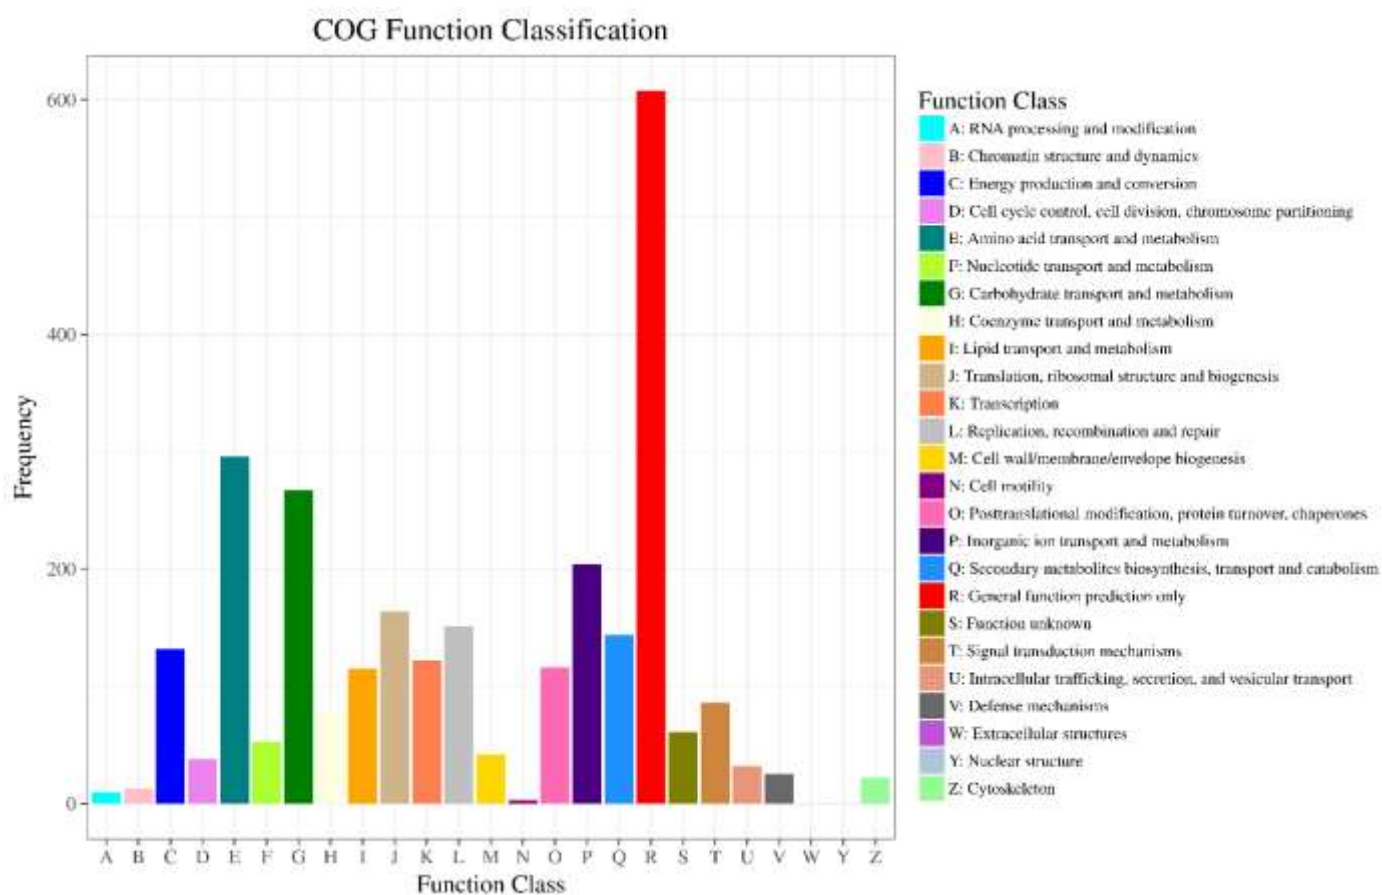

Figure S1. COG function classification of DEGs.
